# Supplementary material for: MYEOV overexpression induced by demethylation of its promoter contributes to pancreatic cancer progression via activation of the folate cycle/c-Myc/mTORC1 pathway
Source: Springer Nature journal article supplement (doi:10.1186/s12885-022-10433-6), 2023-01-25
Supplement: MOESM4 [file 23953572]

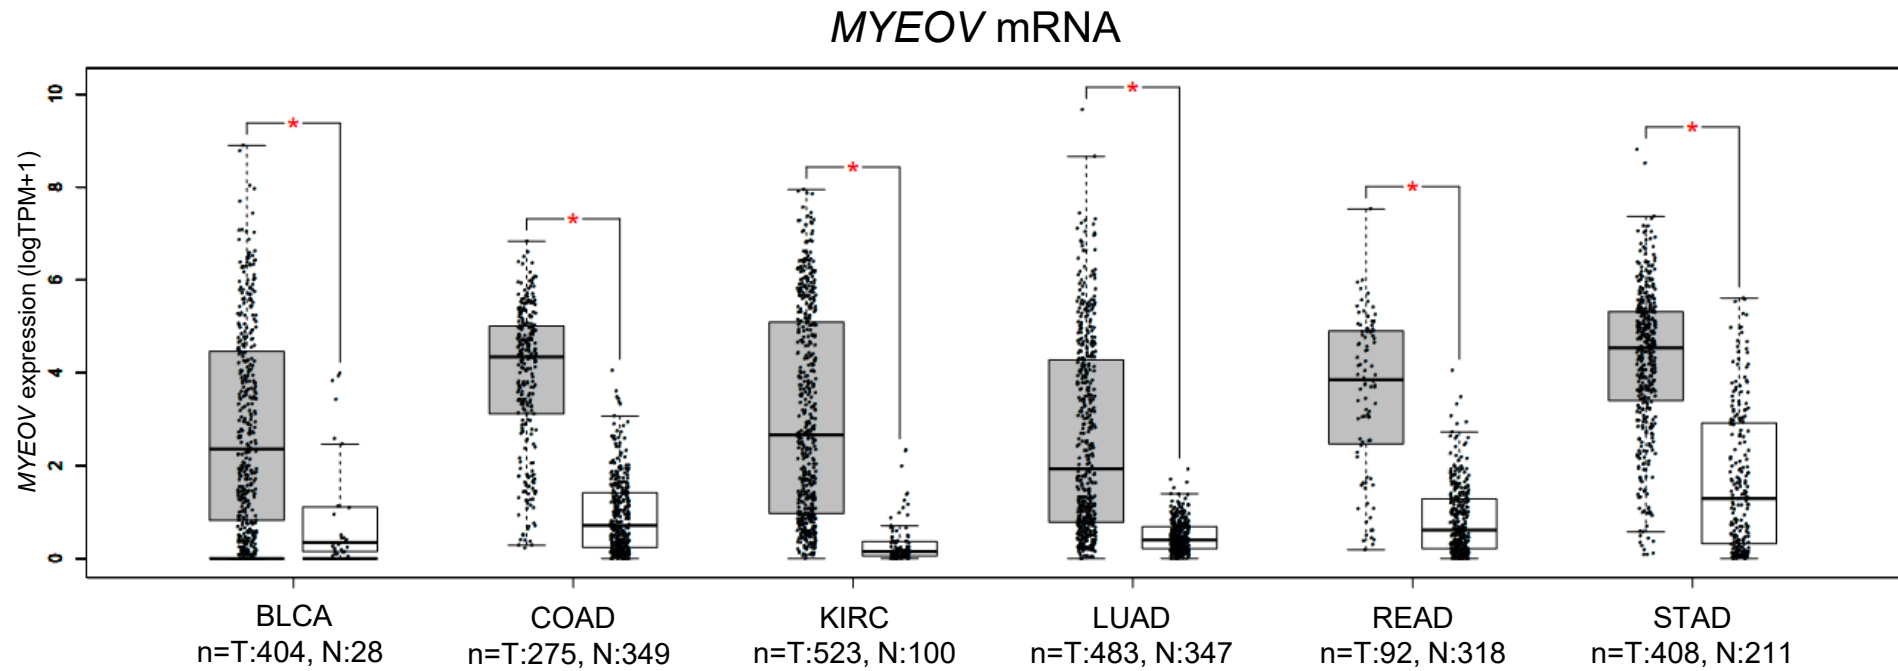

**Fig. S2**

Pan-cancer expression analyses of *MYEOV* in 6 cancer types from GEPIA database. Asterisks indicate significant difference ( $p < 0.01$ ) of expression between tumor (gray box, T) and non-tumor (white box, N)
