# Supplementary material for: MYEOV overexpression induced by demethylation of its promoter contributes to pancreatic cancer progression via activation of the folate cycle/c-Myc/mTORC1 pathway
Source: Springer Nature journal article supplement (doi:10.1186/s12885-022-10433-6), 2023-01-25
Supplement: MOESM5 [file 23953572]

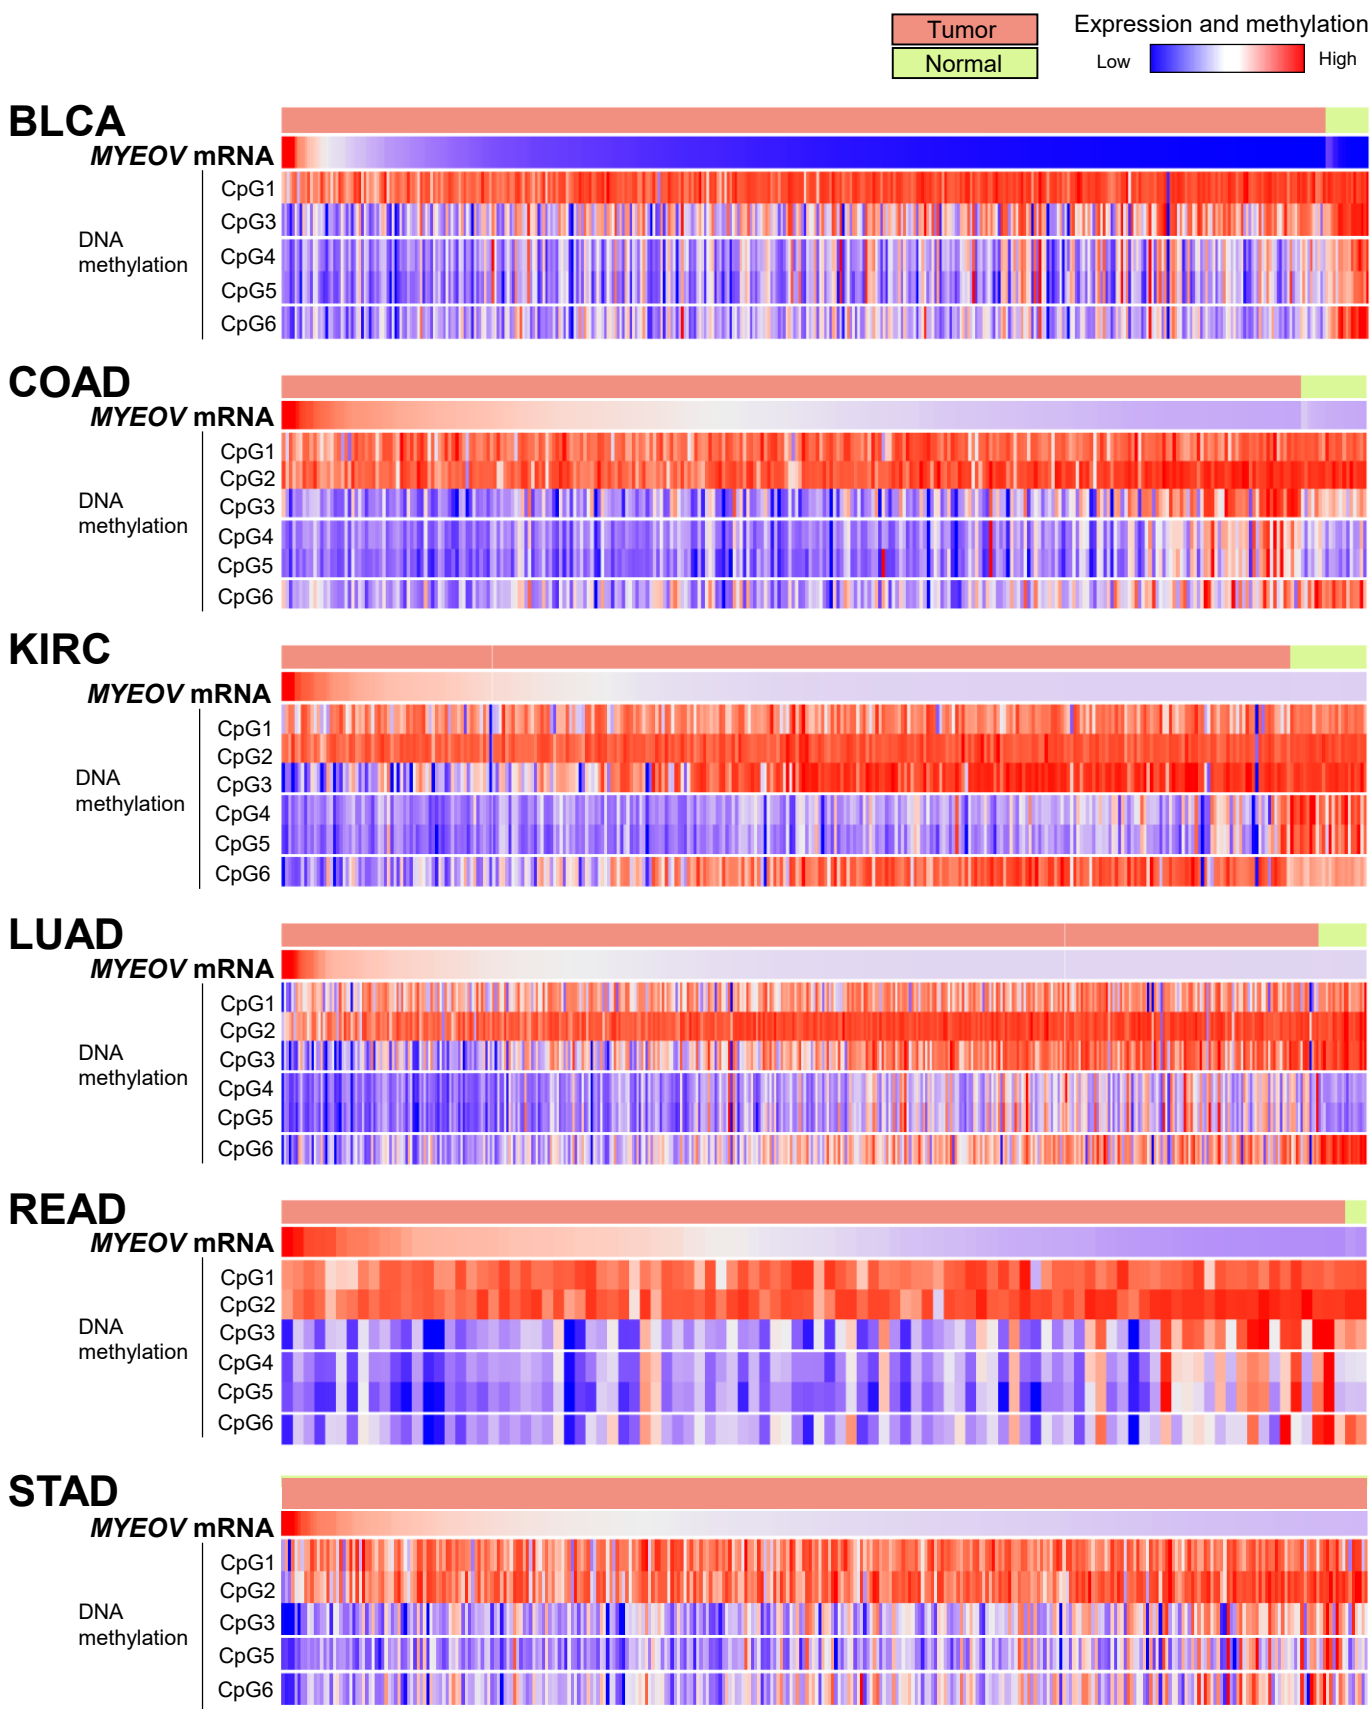

**Fig. S3**

MYEOV mRNA expression and DNA methylation status in patients of multiple cancer types. Heatmap of pancreatic cancer specimens and non-cancerous tissues of the TCGA data set. The expression of MYEOV and the methylation status of six CpG sites in the region indicated in A are depicted. Each column represents individual specimens. Specimens are sorted in descending order based on TPM values in MYEOV.
