# Supplementary material for: MYEOV overexpression induced by demethylation of its promoter contributes to pancreatic cancer progression via activation of the folate cycle/c-Myc/mTORC1 pathway
Source: Springer Nature journal article supplement (doi:10.1186/s12885-022-10433-6), 2023-01-25
Supplement: MOESM11 [file 23953572]

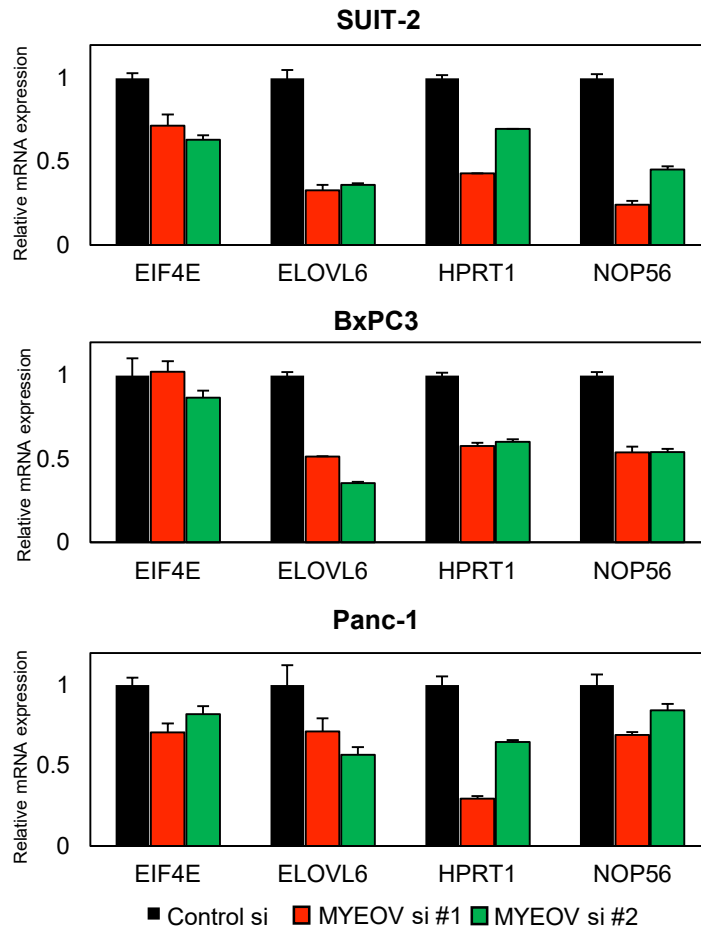

**Fig. S5.** The expression status of c-Myc target genes upon *MYEOV* knockdown. The expression levels of EIF4E, ELOVL6, HPRT1, and NOP56 were measured by qPCR in the indicated cell lines. Black bars indicate cells transfected with control siRNA, and red and green bars represent cells transfected with *MYEOV*-targeting siRNA; TBP was used to normalize the expression levels.
