# Supplementary material for: MYEOV overexpression induced by demethylation of its promoter contributes to pancreatic cancer progression via activation of the folate cycle/c-Myc/mTORC1 pathway
Source: Springer Nature journal article supplement (doi:10.1186/s12885-022-10433-6), 2023-01-25
Supplement: MOESM13 [file 23953572]

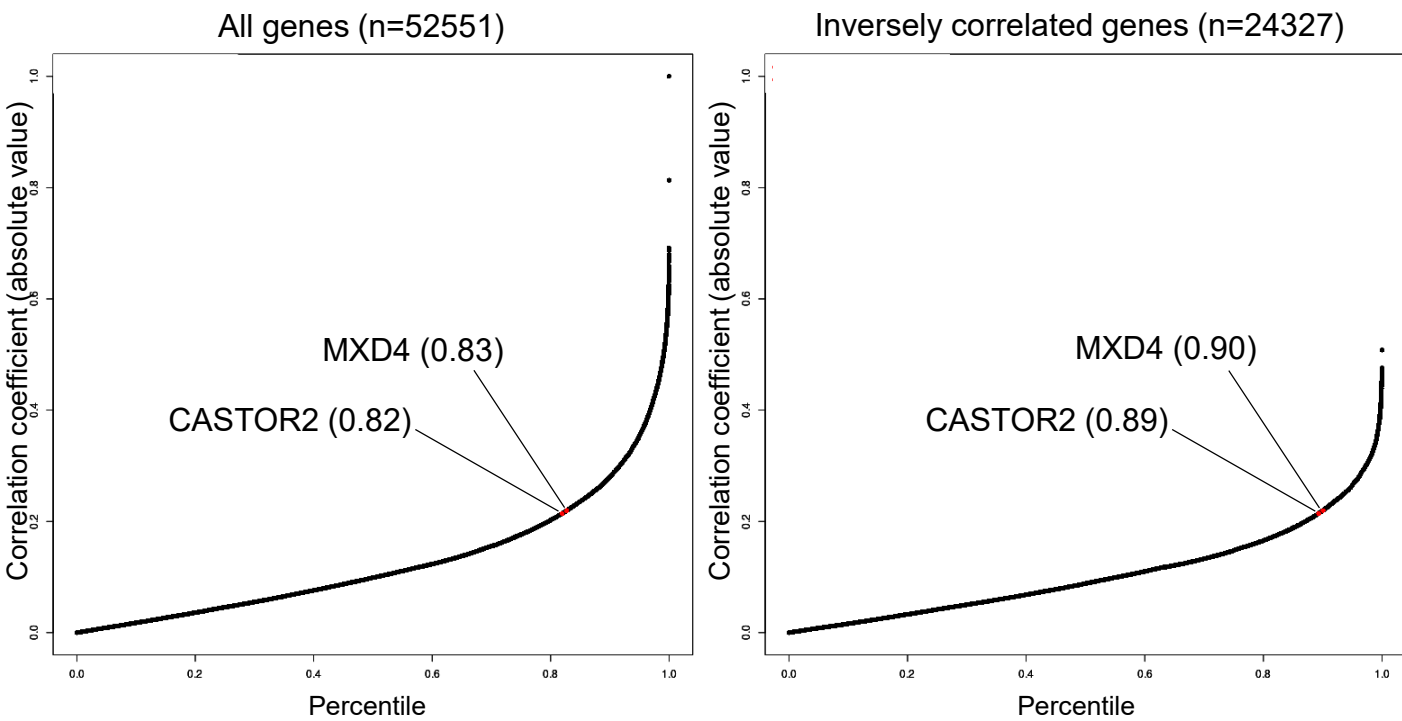

**Fig. S7.** Correlation between MYEOV and MXD4/CASTOR2 expression. In the dataset of pancreatic cancers in TCGA (TCGA-PAAD), Spearman's rank correlation coefficient was calculated between each gene and MYEOV expression using all genes (left panel) or only inversely correlated genes (right panel), and ordered in ascending order. The y axis indicates the absolute values of the correlation coefficients. MXD4 and CASTOR2 are plotted by red dots. Numbers in parentheses indicate the percentile of each gene in ascending order.
